# Supplementary material
Source: PubMed Central journal article supplement (PMC2867564)
Supplement: 00678.2009_1.pdf [file 00678.2009_1.pdf]

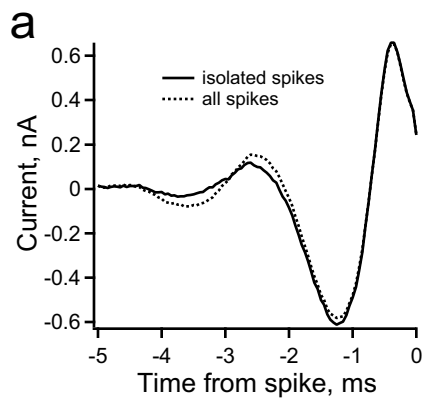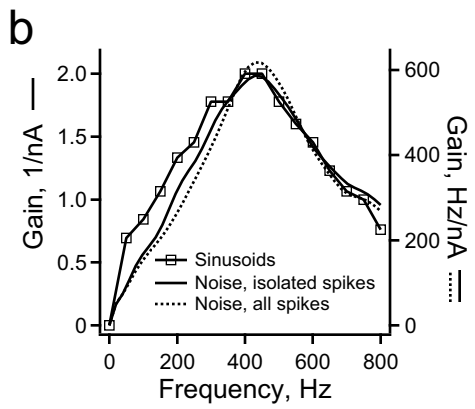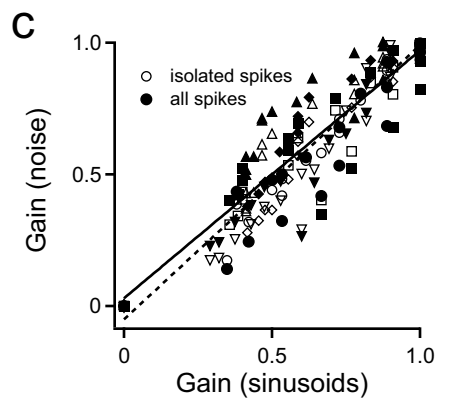

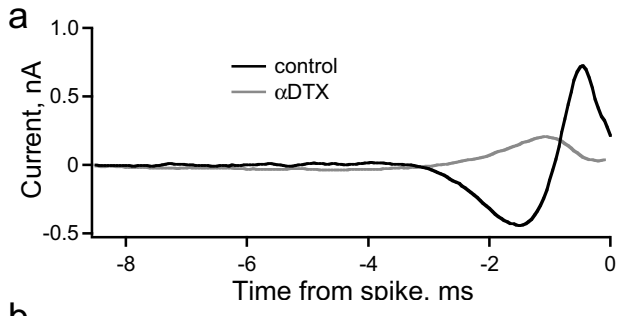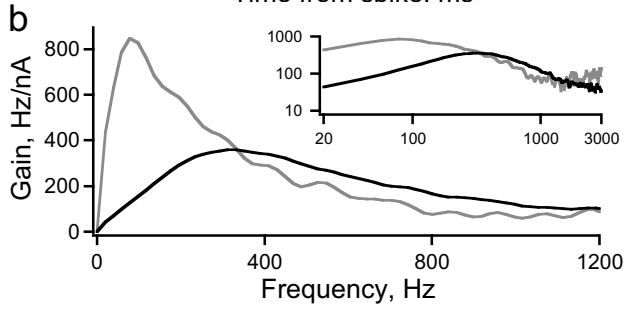

1 **Supplementary Figure 1.** *The effect of spike history on the STA and gain*  
2 *measurements.* Recent spike history is known to affect features of the spike-triggered  
3 average (Powers et al., 2005). To test for the effects of spike history, we computed both  
4 the STA and the frequency-dependent gain using all spikes and using only spikes isolated  
5 by at least 10 ms from the preceding spike. Supplementary Figure 1a shows the STA  
6 from an NL neuron computed in both ways. The tail of the STA computed from isolated  
7 spikes is slightly more damped than the STA computed from all spikes. This behavior  
8 was typical in neurons with obvious spike history affects. Supplementary Figure 1b  
9 shows the frequency-dependent gain computed from both the STAs as well as the gain  
10 measured by threshold-crossing using sinusoids (see *Materials and Methods* for more  
11 details). In this neuron the 3 gain functions are similar. In general we found that the gain  
12 computed from the noise stimulus using all (filled symbols) or isolated spikes (open  
13 symbols) was in close agreement with the gain obtained from threshold-crossing using  
14 sinusoids. However, the isolated spike gain provided a better match. Linear regressions  
15 showed that the threshold-crossing gain was more strongly correlated with gain  
16 calculated using isolated spikes in response to noise (dashed line,  $R^2 = 0.92$ ) than with  
17 gain based on all spikes elicited by noise (solid line,  $R^2 = 0.81$ ), (Supplementary Figure  
18 1c). These results suggest that recent spike history may influence the effective frequency  
19 tuning of NL neurons when they fire at high rates, but that this effect was small within  
20 the range of stimulus parameters used to measure gain in the present study. All noise  
21 responses presented in the results section were analyzed using spikes isolated by at least  
22 10 ms

23

24 **Legend.**

25 (a) The STA current versus time relative to all spikes (dotted line) or spikes isolated by at  
26 least 10 ms (solid line) computed from the response to current noise stimulation. (b) The  
27 frequency-dependent gain calculated from spike responses to sinusoidal current (squares  
28 and solid line) and from noise current using all spikes (dotted line) or isolated spikes  
29 (solid line). (c) The gain at each frequency calculated from responses to noise versus  
30 gain calculated in response to sinusoids in a population of 5 NL neurons. Each set of  
31 symbols indicates the responses of the same neuron to different frequencies. Filled and

32 open symbols indicate gain calculated using all spikes or isolated spikes, respectively.  
33 The lines are linear fits to the data points using all spikes (solid line,  $y(x)=0.94x+0.03$ ,  $R^2$   
34  $= 0.81$ ) or isolated spikes (dashed line,  $y(x)=1.04x-0.05$ ,  $R^2 = 0.92$ ).

35

36 **Supplementary Figure 2.** *The effect of low-threshold voltage-gated  $K^+$  conductance on*  
37 *frequency tuning.* Previous reports have shown that expression of low-threshold voltage-  
38 gated potassium conductance ( $G_{Klt}$ ) in NL varies across the tonotopic axis (Kuba et al.,  
39 2005). The effect of  $G_{Klt}$  on intrinsic frequency tuning in middle-CF NL neurons was  
40 tested by bath application of  $\alpha$ -dendrotoxin (DTX; 100 nM; Alomone Labs). DTX  
41 blocks Kv1.1, 1.2, and 1.6 ion channel subunits and eliminates  $G_{Klt}$  in NL neurons  
42 (Harvey and Robertson, 2004; Kuba et al., 2005). Before noise stimulation, neurons were  
43 held at approximately -46 mV using holding current. A zero-mean noise stimulus was  
44 then added, scaling the noise for each neuron to produce an average firing rate of 5-30  
45 Hz. The holding current and stimulus scale were adjusted before and during  $\alpha$ -  
46 dendrotoxin application to maintain a similar average membrane potential and firing rate  
47 despite the large increase in input resistance that occurs when low-threshold  $K^+$  channels  
48 are blocked.

49

## 50 **Legend**

51 (a) The average STA current versus time relative to each isolated spike for a population  
52 of middle-CF neurons under control (black, n=12) and during bath application of DTX  
53 (gray, n=4). DTX application reduced the STA amplitude and slowed its time course.  
54 These effects on the STA have been observed previously in other classes of auditory  
55 brainstem neurons (Svirskis et al., 2004; Slee et al., 2005). (b) Frequency-dependent gain  
56 computed from the STAs in a. The inset shows the same data on logarithmic axes and  
57 over the entire frequency range represented in NL. The gain functions during DTX  
58 application showed a significant decrease in both the peak frequency (83 $\pm$ 5 Hz) and  
59 gain half width (264 $\pm$ 20 Hz) compared with middle-CF neurons under control  
60 conditions (308 $\pm$ 6 Hz and 635 $\pm$ 12 Hz). In addition, the peak gain in DTX in 3 of 4  
61 neurons (1214, 1268, 609, 309 Hz/nA) was higher than the average of control neurons

62 (360±64 Hz/nA). This result suggests that  $G_{Klt}$  decreases gain at low frequencies but  
63 has only a small effect on gain at high frequencies.

64

65

66 **Supplemental References**

67

68 Harvey AL, Robertson B (2004) Dendrotoxins: structure-activity relationships and effects  
69 on potassium ion channels. *Curr Med Chem* 11:3065-3072.

70 Kuba H, Yamada R, Fukui I, Ohmori H (2005) Tonotopic specialization of auditory  
71 coincidence detection in nucleus laminaris of the chick. *J Neurosci* 25:1924-1934.

72 Powers RK, Dai Y, Bell BM, Percival DB, Binder MD (2005) Contributions of the input  
73 signal and prior activation history to the discharge behaviour of rat motoneurons.  
74 *J Physiol* 562:707-724.

75 Slee SJ, Higgs MH, Fairhall AL, Spain WJ (2005) Two-dimensional time coding in the  
76 auditory brainstem. *J Neurosci* 25:9978-9988.

77 Svirskis G, Kotak V, Sanes DH, Rinzel J (2004) Sodium along with low-threshold  
78 potassium currents enhance coincidence detection of subthreshold noisy signals in  
79 MSO neurons. *J Neurophysiol* 91:2465-2473.

80

81
